# Supplementary material
Source: PubMed Central journal article supplement (PMC9724993)
Supplement: EIJ-D-19-00953_Hara_SD.pdf [file EIJ-D-19-00953_Hara_SD.pdf]

## Supplementary data

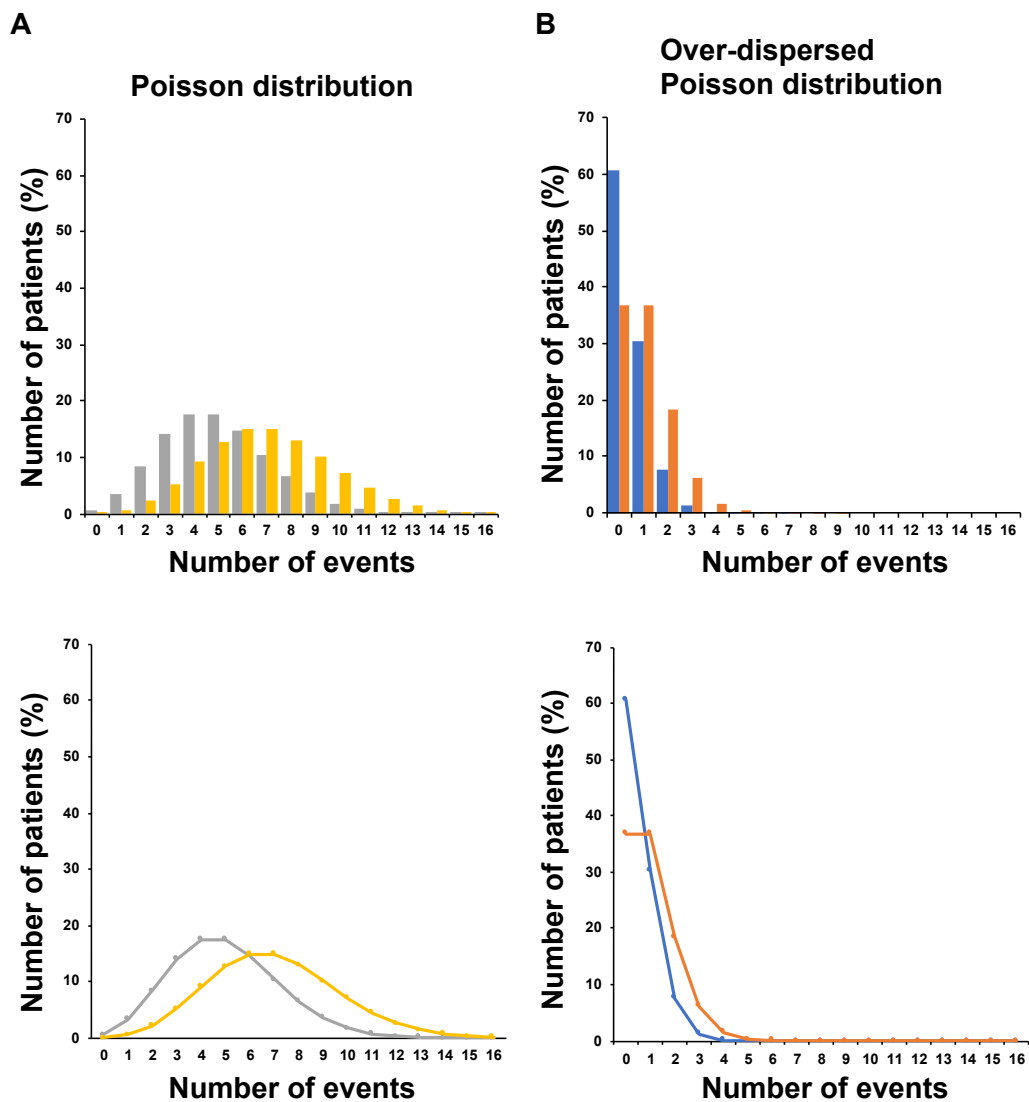

**Supplementary Figure 1.** Poisson distribution.

A) The number of events in an interval of time may be represented by a Poisson distribution.

The basic shapes of a Poisson distribution (grey and yellow) change according to the probability of events, unlike a Gaussian distribution, which is always symmetric.

B) When the frequency of events is very small (e.g., blue or orange), the variance may be greater than the mean. In this case, the data will approximately follow an over-dispersed Poisson distribution.
